# Supplementary material for: A chemometrics approach for simultaneous determination of cyanazine and propazine based on a carbon paste electrode modified by a molecularly imprinted polymer
Source: Royal Society of Chemistry journal article supplement (doi:10.1039/c2an15588e), 2012-01-01
Supplement: c2an15588e.pdf [file c2an15588e.pdf]

**A Chemometrics Approach for Simultaneous Determination of Cyanazine and Propazine  
Based on a Carbon Paste Electrode Modified by a Novel Molecularly Imprinted Polymer**

Mohammad Bagher Gholivand\*, Nashmil Karimian, Maryam Torkashvand

*Department of Analytical Chemistry, Faculty of Chemistry, Razi University, Kermanshah,  
Iran*

The Supporting Information includes two tables. Table S-1 summarizes the results of the theoretical study for finding the best monomer for preparation of the molecularly imprinted polymer. The second one (Table S-2) shows the design matrix based on fractional factorial design. The responses for each experiment have been included in Table S-2.

---

\* Corresponding Author: M.B.Gholivand, Tel: +98 831 4274557, Fax: +98 831 4274559

E mail: [mbgholivand@yahoo.com](mailto:mbgholivand@yahoo.com)

Table S-1

Calculated interaction energies ( $E$ ,  $\text{kJ mol}^{-1}$ ) for 1:1 and 1:2 template–monomer complexes with and without BSSE correction in the gas-phase.

| <b>Complexes</b> | $\Delta E_{\text{non corr.}}$ | $\Delta E_{\text{corr.}}$ |
|------------------|-------------------------------|---------------------------|
| PR-(MAA)         | -78.015                       | -62.769                   |
| PR-(TFMAA)       | -75.939                       | -61.415                   |
| PR-(AA)          | -72.693                       | -57.345                   |
| PR-(AAM)         | -68.325                       | -53.466                   |
| PR-(4-VP)        | -36.806                       | -26.732                   |
| PR-(MMA)         | -34.884                       | -22.908                   |
| PR-(ACN)         | -31.470                       | -22.805                   |
| PR-(MAA)2        | -154.216                      | -123.870                  |
| PR-(MAAM)2       | -149.759                      | -120.283                  |
| PR-(TFMAA)2      | -148.677                      | -119.713                  |
| PR-(AA)2         | -143.598                      | -113.060                  |
| PR-(AAM)2        | -134.712                      | -105.055                  |
| PR-(4-VP)2       | -72.660                       | -52.143                   |
| PR-(MMA)2        | -68.839                       | -45.242                   |
| PR-(ACN)2        | -61.604                       | -44.364                   |

Page: 4

Table S-2

Design matrix of FFD for identifying the important factors and the responses obtained.

| Experiment No. | Factor |                      |                                         |                        | Ip for cyanazine ( $\mu\text{A}$ ) | Ip for propazine ( $\mu\text{A}$ ) |
|----------------|--------|----------------------|-----------------------------------------|------------------------|------------------------------------|------------------------------------|
|                | pH     | $E_{\text{acc}}$ (V) | $v$ ( $\text{mV}\cdot\text{sec}^{-1}$ ) | $t_{\text{acc}}$ (sec) |                                    |                                    |
| 1              | 1.0    | -0.8                 | 100                                     | 100                    | 0.21                               | 0.85                               |
| 2              | 2.5    | -0.3                 | 55                                      | 200                    | 10.50                              | 11.00                              |
| 3              | 4.0    | -0.8                 | 10                                      | 100                    | 3.20                               | 3.90                               |
| 4              | 4.0    | -0.8                 | 100                                     | 300                    | 2.50                               | 5.60                               |
| 5              | 2.5    | -0.3                 | 55                                      | 200                    | 11.20                              | 10.00                              |
| 6              | 1.0    | 0.2                  | 10                                      | 100                    | 0.49                               | 0.19                               |
| 7              | 1.0    | 0.2                  | 100                                     | 300                    | 0.55                               | 0.18                               |
| 8              | 4.0    | 0.2                  | 100                                     | 100                    | 2.80                               | 2.80                               |
| 9              | 4.0    | 0.2                  | 10                                      | 300                    | 2.90                               | 3.70                               |
| 10             | 1.0    | -0.8                 | 10                                      | 300                    | 5.00                               | 4.60                               |
| 11             | 2.5    | -0.3                 | 55                                      | 200                    | 12.00                              | 9.20                               |

Considering the absolute values of the coefficients of the linear terms in the models obtained by FFD, it is observed that those of  $v$  and  $t_{\text{acc}}$  are small. This is also the case about the interaction factors containing  $v$  and  $t_{\text{acc}}$ . On the other hand, the absolute values of coefficients Ph and Eacc in the linear terms and the term showing their interaction is very high. Therefore, ph and Eacc and interactions containing both of them are relevant factors and are relevant factors  $v$  and  $t_{\text{acc}}$  are not.
